# Supplementary material for: A highly conductive and robust micrometre-sized SiO anode enabled by an in situ grown CNT network with a safe petroleum ether carbon source
Source: Royal Society of Chemistry journal article supplement (doi:10.1039/d4cp00116h), 2024-01-01
Supplement: d4cp00116h1.pdf [file d4cp00116h1.pdf]

# **A Highly Conductive and Robust Micrometre-sized SiO Anode Enabled by In Situ Grown CNT Network with a Safe Petroleum Ether Carbon Source**

Xiaobo Duan<sup>a,\*</sup>, Jiaao Yu<sup>a</sup>, Yancai Liu<sup>a</sup>, Yanqiang Lan<sup>a</sup>, Jian Zhou<sup>a</sup>, Birou Lu<sup>a</sup>, Lina Zan<sup>a</sup>, Zimin Fan<sup>a</sup>,  
Lei Zhang<sup>a,\*</sup>

<sup>a</sup>Department of Materials Science & Engineering, Xi'an University of Science and Technology, Xi'an,  
710054, Shaanxi, China.

<sup>\*</sup>Corresponding authors.

Email address: xiaobo12558@163.com (Xiaobo Duan); zhanglei5954@163.com (Lei Zhang).

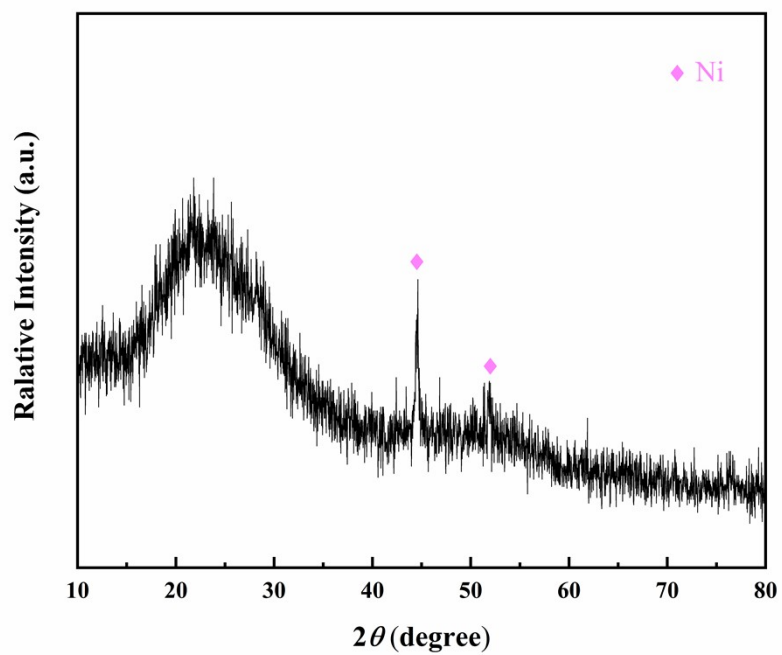

Figure S1. XRD spectrum of SiO@Ni treated at 600°C.

---

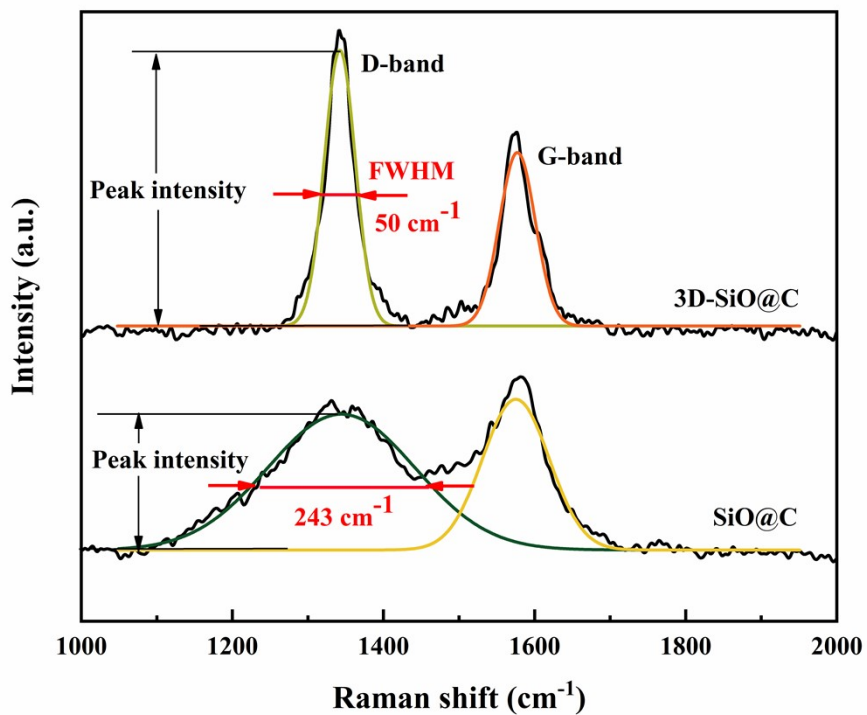

Figure S2. FWHM of D-band in Raman peaks for 3D-SiO@C and SiO@C.

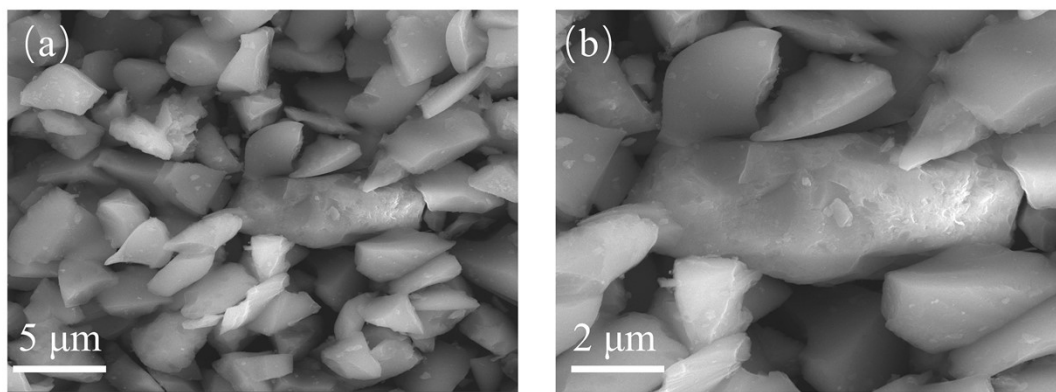

**Figure S3.** The SEM images of pristine SiO particle.

---

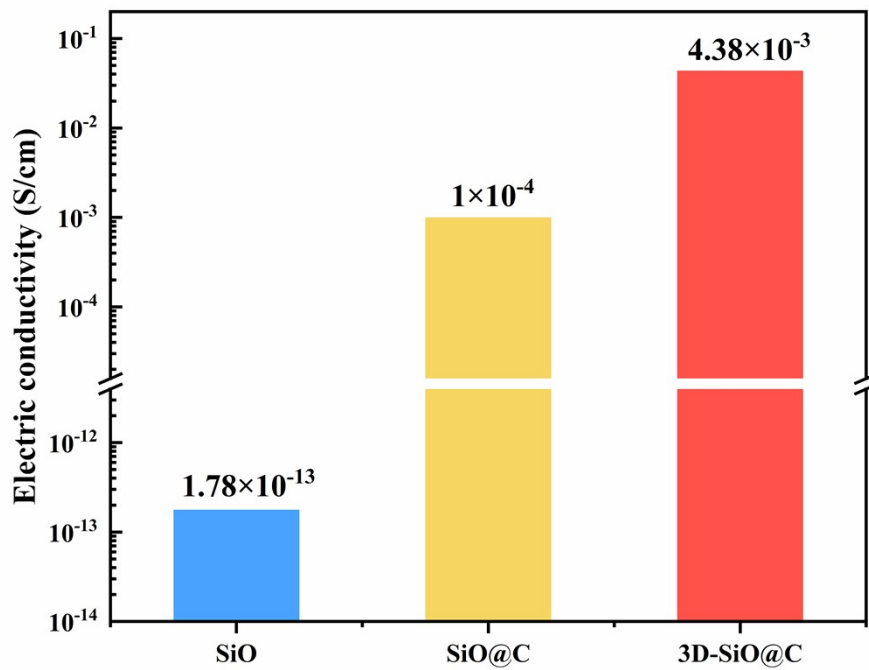

Figure S4. Electrical conductivity results of SiO, SiO@C and 3D-SiO@C.

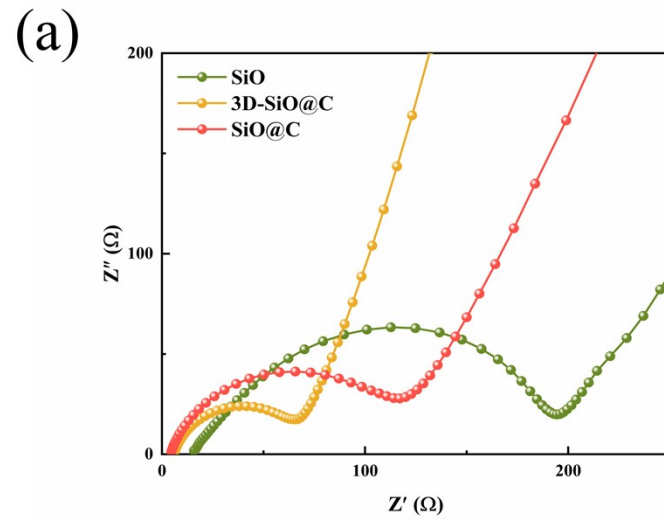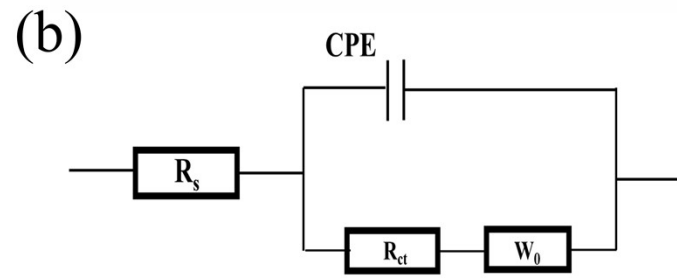

Figure S5. (a) EIS curves of SiO, 3D-SiO@C and SiO@C; (b) Equivalent circuit model.

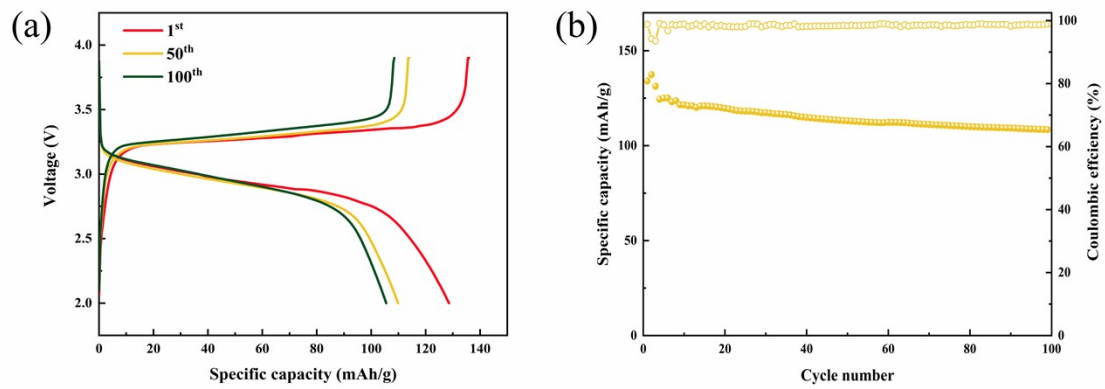

Figure S6. Cycle performance of LFP/3D-SiO@C full cell at 0.5 C.

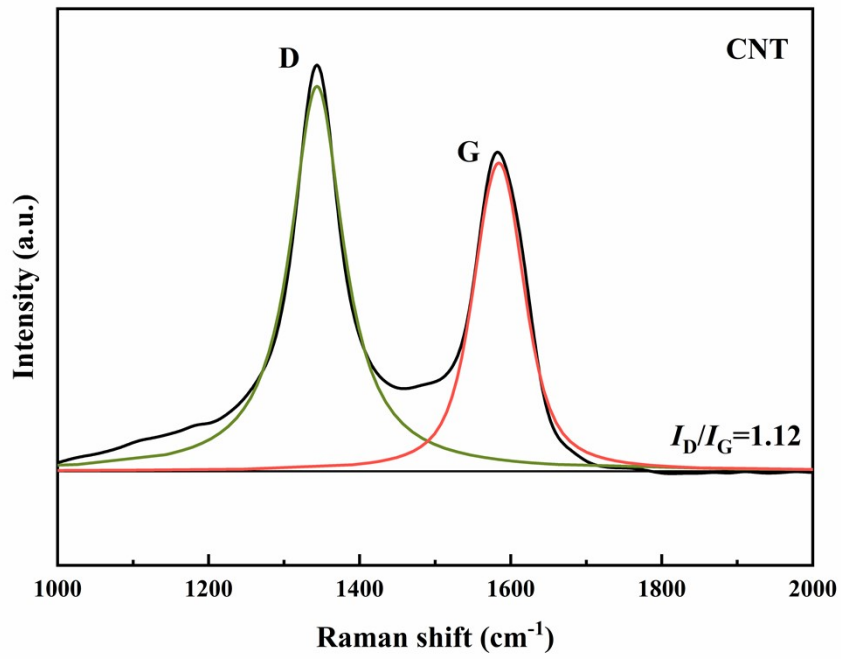

Figure S7. Raman spectrum fitting for pure CNTs.



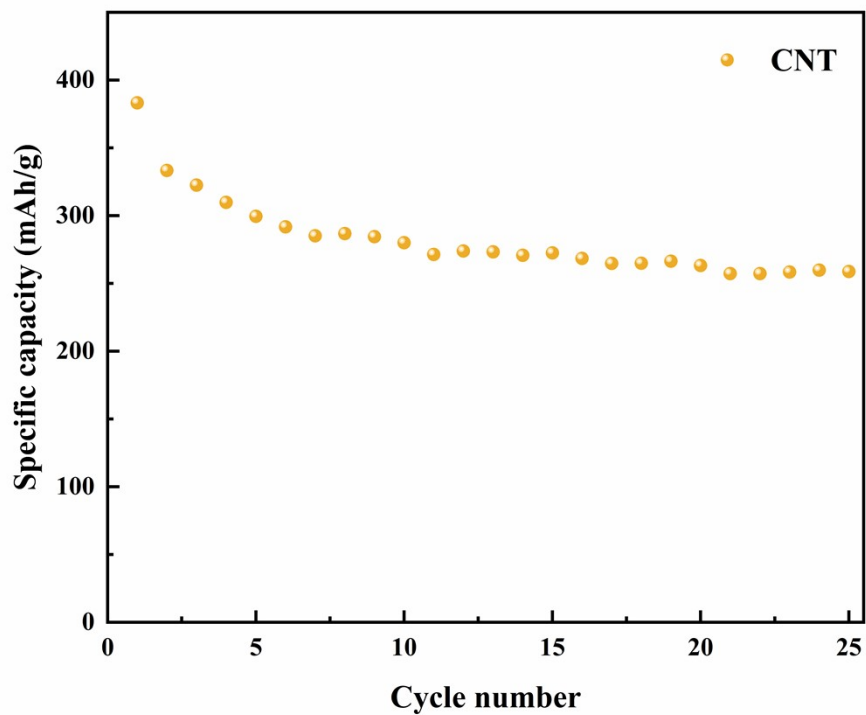

Figure S8. Cycling performance of the pure CNT anode.

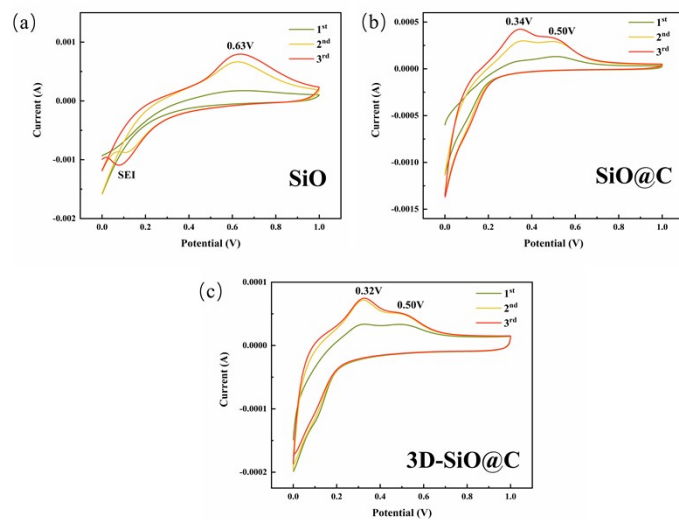

**Figure S9.** CV Curves of SiO, SiO@C and 3D-SiO@C.

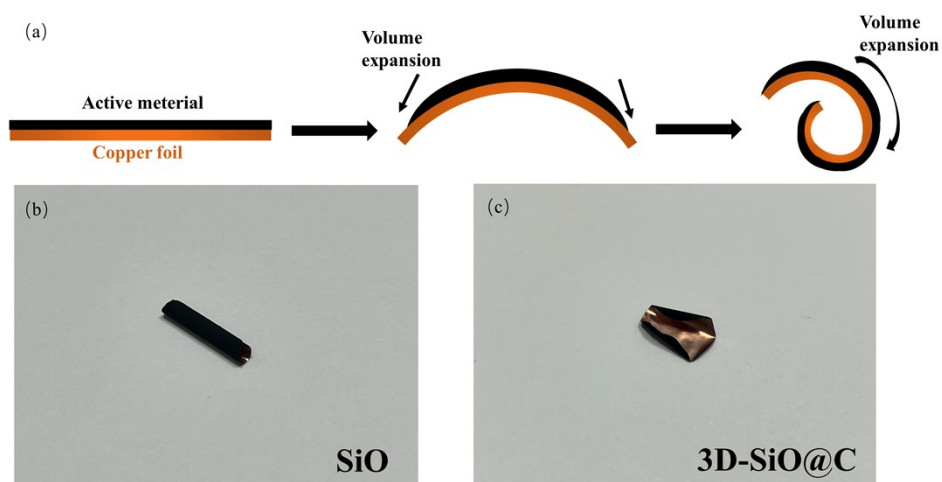

**Figure S10.** (a) Schematic diagram of electrode expansion; Photos of electrodes after cycle. (b) SiO@C; (c) 3D-SiO@C.

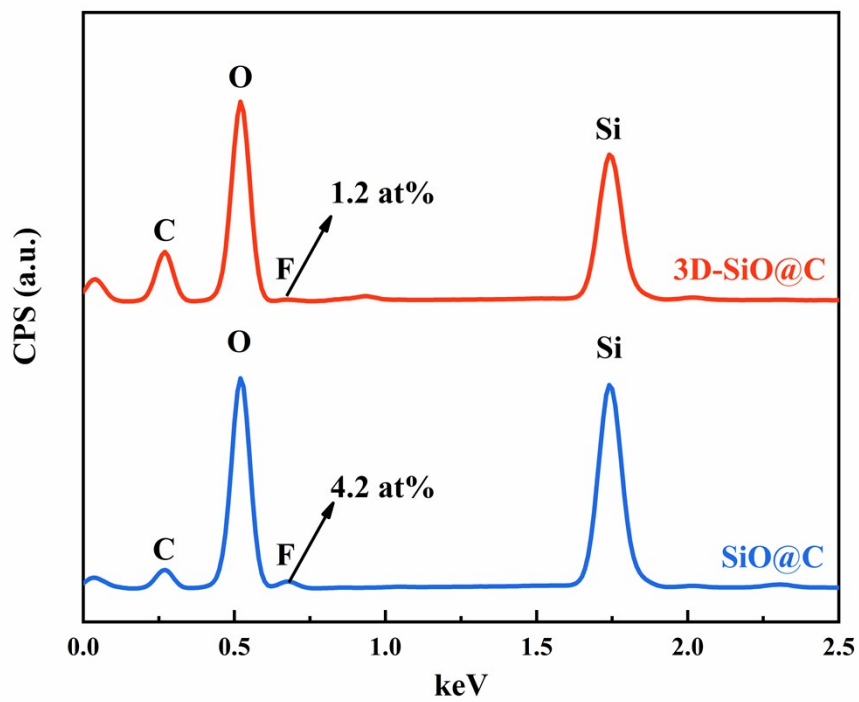

Figure S11. F contents of the surface of 3D-SiO@C and SiO@C electrodes after 100 cycles.

Table S1. Carbon contents of SiO@C and 3D-SiO@C powder from carbon-sulfur analyzer

| Sample   | Carbon content (wt %) |
|----------|-----------------------|
| SiO@C    | 2.55                  |
| 3D-SiO@C | 14.8                  |

Table S2. EIS fitting data of SiO, SiO@C and 3D-SiO@C electrodes before cycle

| Sample   | Rs ( $\Omega$ ) | Rct ( $\Omega$ ) |
|----------|-----------------|------------------|
| SiO      | 16.18           | 187.50           |
| SiO@C    | 2.55            | 94.14            |
| 3D-SiO@C | 5.86            | 62.14            |

Table S3. Capacity retention of three materials after 100 cycles

| Sample   | Remaining specific capacity (mAh/g) | Capacity retention (%) |
|----------|-------------------------------------|------------------------|
| 3D-SiO@C | 991.3                               | 78                     |
| SiO@C    | 177.7                               | 18.9                   |
| SiO      | 0                                   | 0                      |

Table S4. Performance comparison for our work and other published literature recently

| Material                                      | Particle size   | Reversible specific capacity                                                                  | Current density [A/g] | Reference |
|-----------------------------------------------|-----------------|-----------------------------------------------------------------------------------------------|-----------------------|-----------|
| Carbon-coated SiO/ZrO <sub>2</sub> composites | 200-500 nm      | 721 mAh/g after 100 cycles                                                                    | 0.8                   | 1         |
| SiOx/C                                        | 300 nm          | 802 mAh/g after 300 cycles                                                                    | 0.2                   | 2         |
| P-SKW@C                                       | 341 nm          | 905 mAh/g after 200 cycles                                                                    | 0.5                   | 3         |
| HT-Si@Cu-0.08                                 | 100-150 nm      | 837 mAh/g after 400 cycles                                                                    | 1                     | 4         |
| SiCA@C                                        | ~15-20 nm       | 760 mAh/g after 300 cycles                                                                    | 0.1                   | 5         |
| PCS/Si-2                                      | ~100 nm         | 585.6 mAh/g after 1000cycles                                                                  | 0.5                   | 6         |
| SiOx/C                                        | 4.78±1.23 nm    | 794 mAh/g after 150 cycles                                                                    | 0.1                   | 7         |
| Si@C-1.5h                                     | 25 nm           | 508 mAh/g after 500 cycles                                                                    | 0.5                   | 8         |
| Si/SiOx@G@C                                   | ~1 $\mu$ m      | 780 mAh/g after 100 cycles                                                                    | 0.1                   | 9         |
| Si@DCSS                                       | 400 nm          | 525 mAh/g after 300 cycles                                                                    | 1                     | 10        |
| SiMPs@GO/ssDNA                                | Few micrometers | 808 mAh/g after 450 cycles                                                                    | 0.84                  | 11        |
| Si2SHXF                                       | ~500 nm         | 622 mAh/g after 400 cycles                                                                    | 0.1                   | 12        |
| Si@VG                                         | 80-100 nm       | 444.9 mAh/g after 200 cycles                                                                  | 0.5                   | 13        |
| Fe-N-C/SiOx/C-3                               | 200 nm          | 832.6 mAh/g after 250 cycles                                                                  | 0.1                   | 14        |
| SiCNTs-30                                     | 15.2 nm         | 980 mAh/g after 100 cycles                                                                    | 0.25                  | 15        |
| CNT/S/Silicon oxide                           | Few nanometers  | 368 mAh/g after 250 cycles                                                                    | 1                     | 16        |
| PSi@C                                         | ~0.85 $\mu$ m   | 652 mAh/g after 300 cycles                                                                    | 0.5                   | 17        |
| Si/C-LPR                                      | ~70 nm          | 605.43 mAh/g after 100 cycles                                                                 | 0.5                   | 18        |
| Si@SiOx/Ag/CN                                 | 200 nm          | 759 mAh/g after 300 cycles                                                                    | 0.5                   | 19        |
| 3D-SiO@C                                      | 5 $\mu$ m       | 991.3 mAh/g after 100 cycles<br>832.8 mAh/g after 300 cycles<br>687.7 mAh/g after 1000 cycles | 0.5                   | This work |

Table S5. The element contents in the XPS results of SiO@C and 3D-SiO@C anode after 100 cycles

| Element | Content (at%) |          |
|---------|---------------|----------|
|         | SiO@C         | 3D-SiO@C |
| C 1s    | 35.76         | 38.99    |
| F 1s    | 7.77          | 2.95     |
| Li 1s   | 31.06         | 29.96    |
| O 1s    | 24.12         | 27.53    |
| P 2p    | 1.29          | 0.57     |

## References

1. F. Cheng, G. Wang, Z. Sun, Y. Yu, F. Huang, C. Gong, H. Liu, G. Zheng, C. Qin and S. Wen, *Ceram Int.*, 2017, **43**, 4309-4313.
2. J. Song, S. Guo, L. Kou, K. Kajiyoshi, J. Su, W. Huang, Y. Li and P. Zheng, *Vacuum*, 2021, **186**, 110044.
3. H. Yang, Y. Li, W. Chen, C. Zhang, L. Huang, X. Luo and Fuels, *Energ Fuel*, 2024, **38**, 5568-5579.

4. Y. Xu, Y. Zhang, Q. Hu, H. Li, F. Jiao, W. Wang, S. Zhang, H. Du and Interfaces, *ACS Appl. Mater. Interfaces*, 2024, **16**, 5058-5066.
5. R. Nandan, N. Takamori, K. Higashimine, R. Badam and N. Matsumi, *ACS Appl. Energy Mater.*, 2024, **7**, 2088-2100.
6. J. Shi, Y. Sun, Y. Peng, X. Jiang, J. Li, J. Chen and G. Liu, *J. Energy Storage*, 2024, **80**, 110164.
7. Y. Lin, Z. Zha, X. Hui, T. Hu, U. Lassi, Z. Chen, R. Ma and Z. Wu, *Mater. Today Chem.*, 2024, **36**, 101925.
8. J. Li, B. Rui, J. Zhao, R. He, S. Liu, W. Shi, X. Wang, L. Chang, Y. Cheng and P. Nie, *J. Power Sources*, 2024, **597**, 234131.
9. W. Han, S. Wu, X. Xu, L. Wei and X. Zhang, *J. Electroanal. Chem.*, 2024, **953**, 117951.
10. Y. Gao, Z. Zhang, R. Cui, S. Wang, Z. Li, X. Zhang, R. Chen and L. Hou, *New J. Chem.*, 2024, **48**, 2464-2473.
11. L. Ding, Y. Zhao, A. Omar, W. Feng, M. Hantusch and D. Mikhailova, *Adv. Funct. Mater.*, 2024, DOI: 10.1002/adfm.202305934.
12. S. S. Bishoyi and S. K. Behera, *J. Alloys Compd.*, 2024, **982**, 173766.
13. D. Zhang, P. Yu, Y. Zhang, X. Zhao and J. Yu, *ACS Appl. Energy Mater.*, 2024, **7**, 726-734.
14. X. Kong, Z. Xi, Y. Jiang, S. Li, X. Chen, J. Zhang, L. Wang, Z. Wan and A. Pan, *Chem. Eng. J.*, 2023, **477**, 147178.
15. A. Thapa and H. Gao, *J. Electrochem. Soc.*, 2024, **171**, 010504.
16. A. C. Joshi, D. Dutta, R. Aleander, M. Roy and K. Dasgupta, *ChemNanoMat*, 2024, DOI: 10.1002/cnma.202400014.
17. S. Liao, X. Shi, Y. Xu, M. Liu, N. Ding, X. Li and Z. Li, *New J. Chem.*, 2023, **47**, 19103-19113.
18. P. Li, C. Miao, D. Yi, Y. Wei, T. Chen and W. Wu, *New J. Chem.*, 2023, **47**, 16855-16863.
19. Y. Li, G. Chen, H. Yang, X. Geng, Z. Luo, C. Zhang, L. Huang and X. Luo, *ACS Appl. Mater. Interfaces*, 2023, **15**, 43887-43898.
